# Supplementary material for: Coumarin 153 Dynamics in Ethylammonium Nitrate: The Effects of Dilution with Methanol
Source: MDPI journal article supplement (doi:10.3390/suschem2040041), 2021-12-20
Supplement: s1 [file s1]

# C153 Dynamics in Ethylammonium Nitrate: The Effects of Dilution with Methanol

Mark P. Heitz <sup>1\*</sup>, Tyler J. Sabo <sup>1</sup>, Stephanie M. Robillard <sup>1</sup>

<sup>1</sup> SUNY Brockport, Department of Chemistry, Brockport, 14420 NY, USA

\* Correspondence: mheitz@brockport.edu

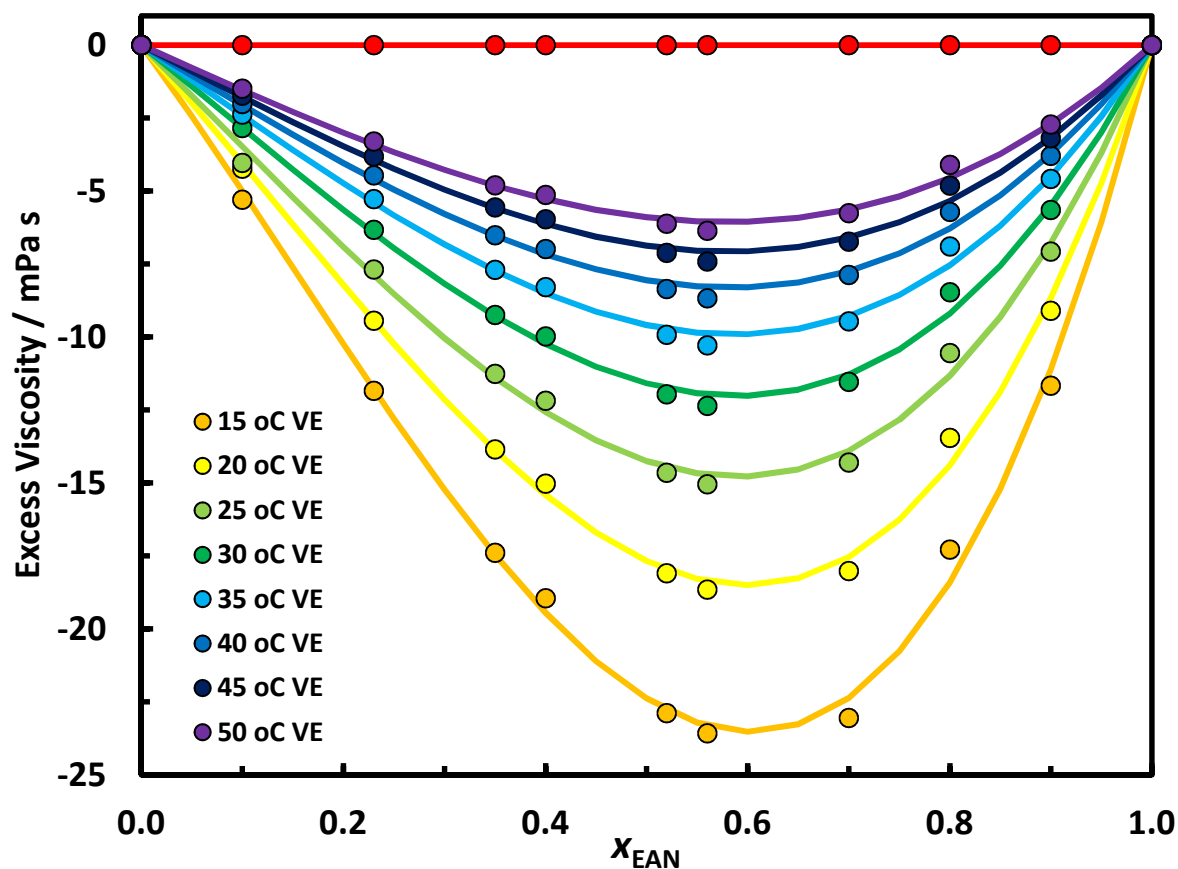

**Figure S1.** Excess viscosities (symbols) for EAN/MeOH as a function of EAN mole fraction for temperatures from 278 – 323 K. Lines are fits to a two component Redlich-Kister polynomial of functional form:<sup>1</sup>.

$$\eta^E = x_{EAN} (1 - x_{EAN}) \sum_{i=1}^N A_i [2x_{EAN} - 1]^{i-1}$$

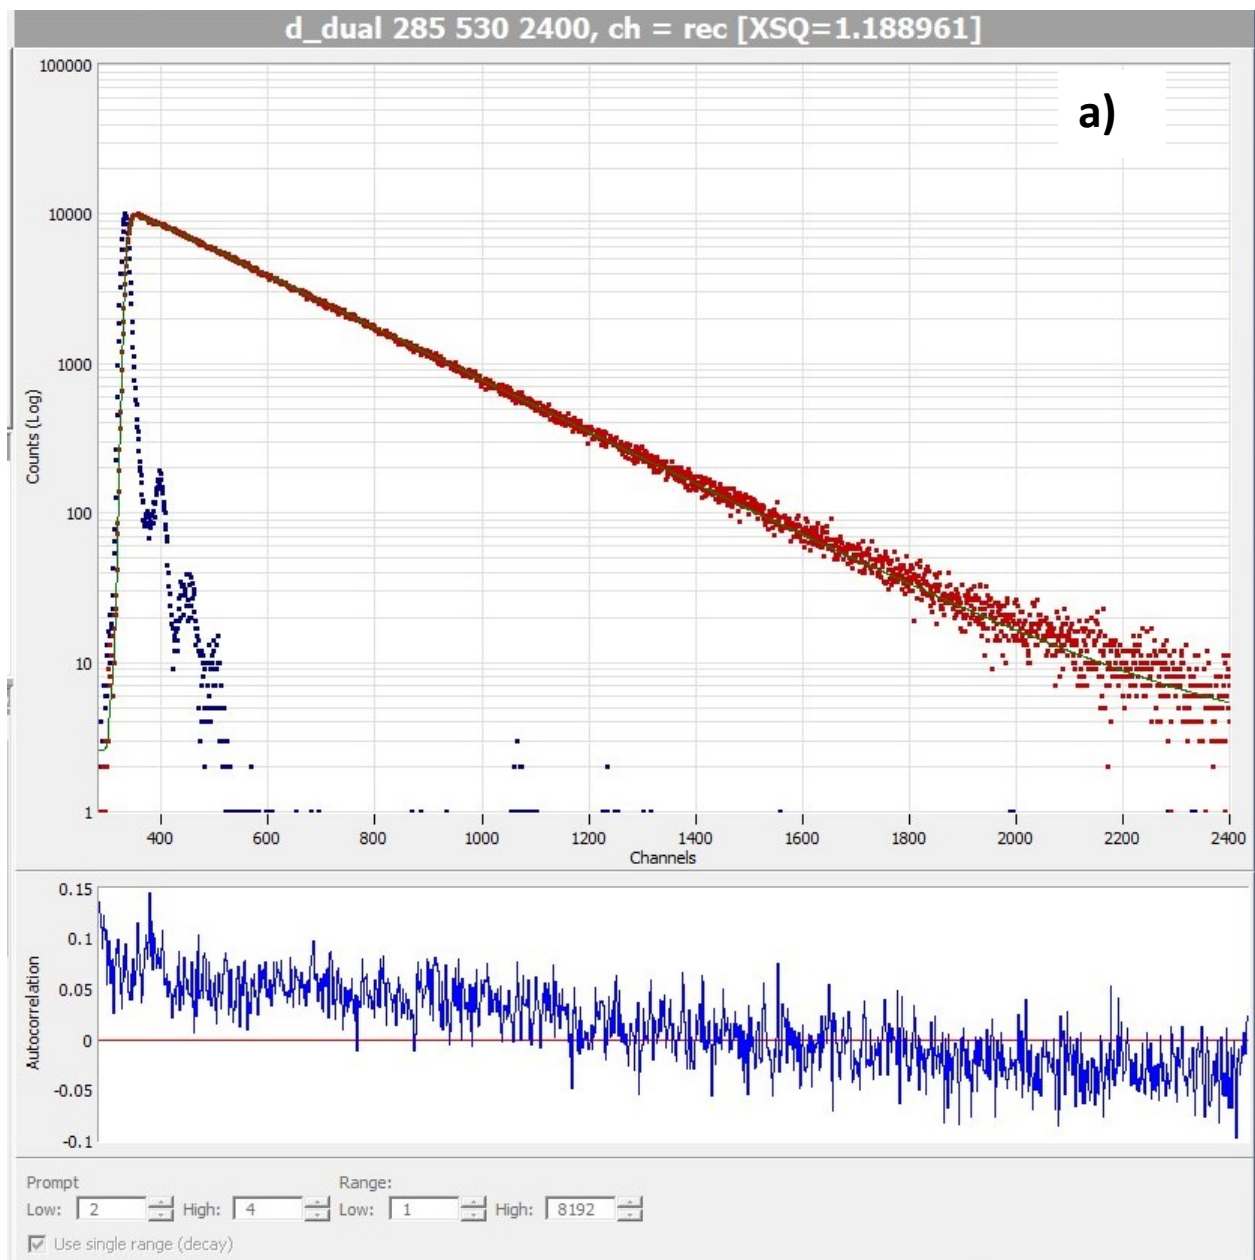

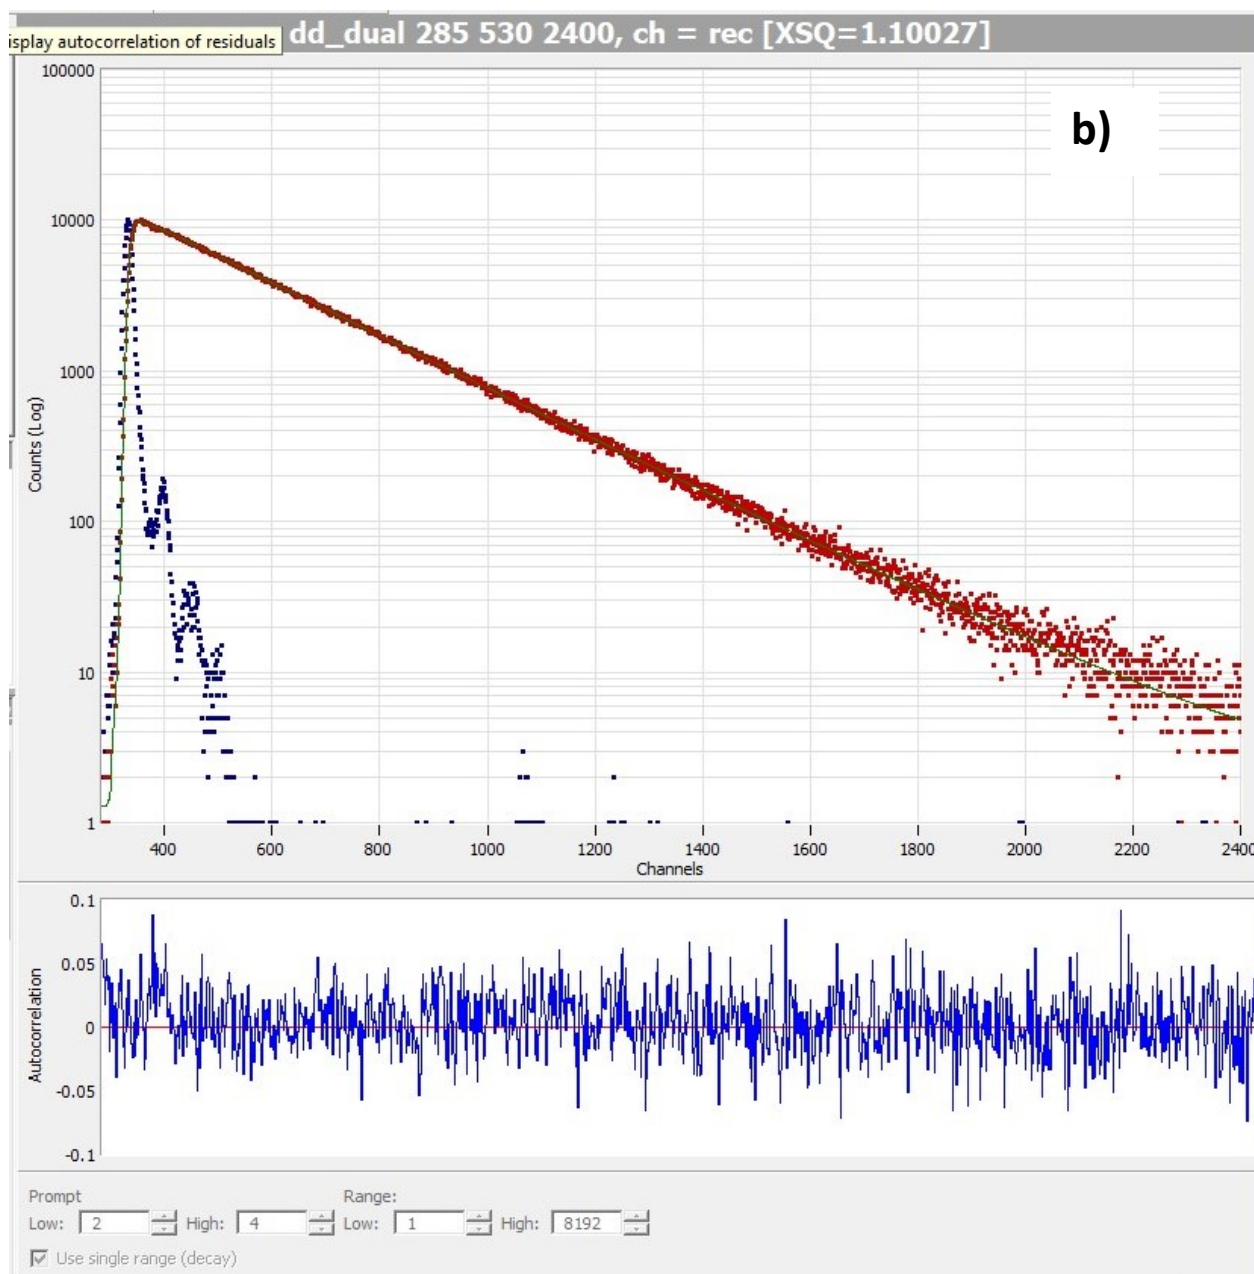

**Figure S2.** a) Autocorrelation of the residuals for  $x_{IL} = 0.2$  EAN/MeOH at 295 K fit to a single exponential model. Note the  $\chi^2 = 1.18$ , which by consideration is an “acceptable fit”. Although the residuals appear convincing that this model is acceptable, the autocorrelation shows a very clear bias across the entire fitting range. b) Autocorrelation of the residuals for  $x_{IL} = 0.2$  EAN/MeOH at 295 K fit to a double exponential model. Note the small improvement in  $\chi^2 = 1.10$  but much more significant is the randomness of the autocorrelation function. This argues for inclusion of a second time constant to properly describe the intensity decay.

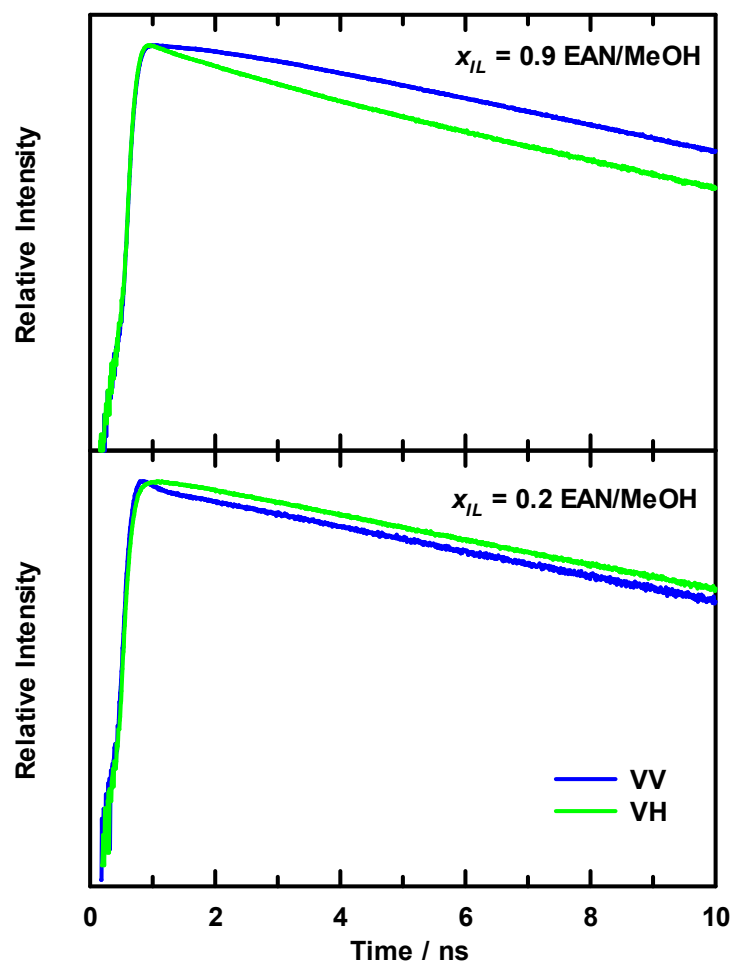

**Figure S3.** Parallel and perpendicular intensity decays for EAN/MeOH at 295 K. Lower panel shows polarized intensity decays for  $x_{IL} = 0.2$  and upper panel is  $x_{IL} = 0.9$ . The traces intensities were normalized to 1. Note that more time is required for the decays to tail-match, which is the criterion to compute the anisotropy decay.

#### Reference

1. McAtee, Z. P.; Heitz, M. P. Density, Viscosity and Excess Properties in the Trihexyltetradecylphosphonium Chloride Ionic Liquid/Methanol Cosolvent System. *J. Chem. Thermodyn.*, **2016**, *93*, 34-44.
