# Supplementary material for: Coumarin 153 Dynamics in Ethylammonium Nitrate: The Effects of Dilution with Methanol
Source: MDPI journal article supplement (doi:10.3390/suschem2040041), 2021-12-20
Supplement: s1 [file s1]

Archive with 1 entries (1 files):
- suschem-1477474-supplementary.pdf
